# Supplementary material for: Comparative analysis of the mitochondrial genomes of Colletotrichum gloeosporioides sensu lato: insights into the evolution of a fungal species complex interacting with diverse plants
Source: PubMed Central journal article supplement (PMC5311727; doi:10.1186/s12864-016-3480-x), 2017-02-15
Supplement: 12864_2016_3480_MOESM2_ESM.pdf [file 12864_2016_3480_MOESM2_ESM.pdf]

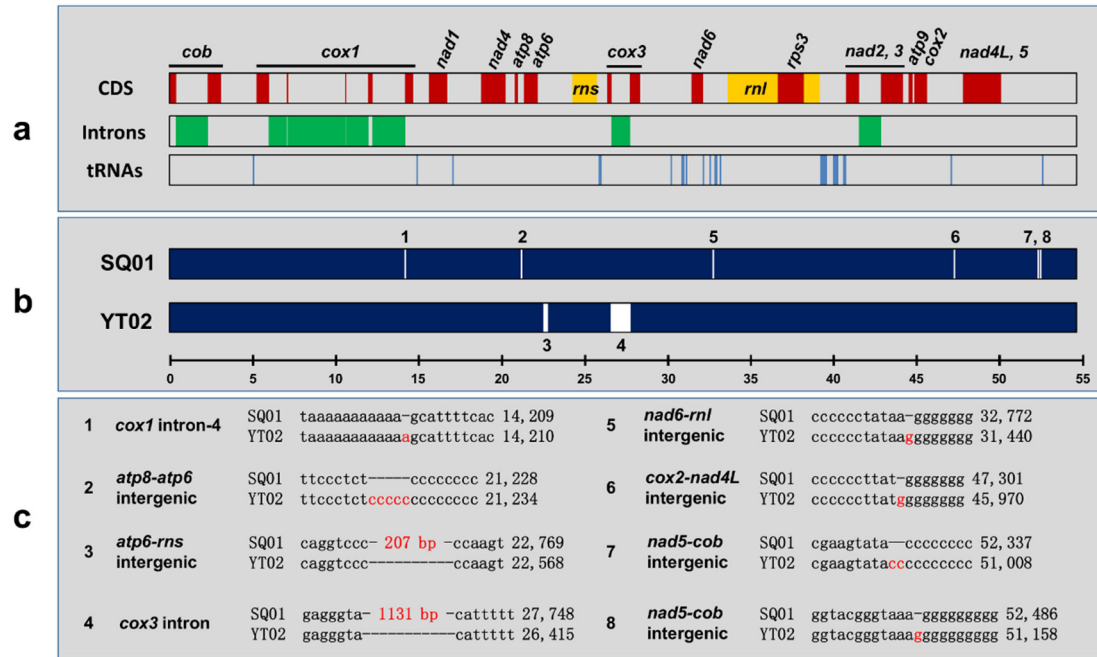

**Figure S1.** SQ01 (*C. siamense* s.l.) mitogenome gene features and its sequence comparison with that of YT02 (*C. siamense* s.l.). **a.** Schematic representation of the SQ01 mitogenome features. **b.** Positions of the eight InDel variable sites within SQ01 and YT02 mitogenomes. **c.** Local DNA sequence alignments at the InDel sites.
