# Supplementary material for: Comparative analysis of the mitochondrial genomes of Colletotrichum gloeosporioides sensu lato: insights into the evolution of a fungal species complex interacting with diverse plants
Source: PubMed Central journal article supplement (PMC5311727; doi:10.1186/s12864-016-3480-x), 2017-02-15
Supplement: 12864_2016_3480_MOESM4_ESM.pdf [file 12864_2016_3480_MOESM4_ESM.pdf]

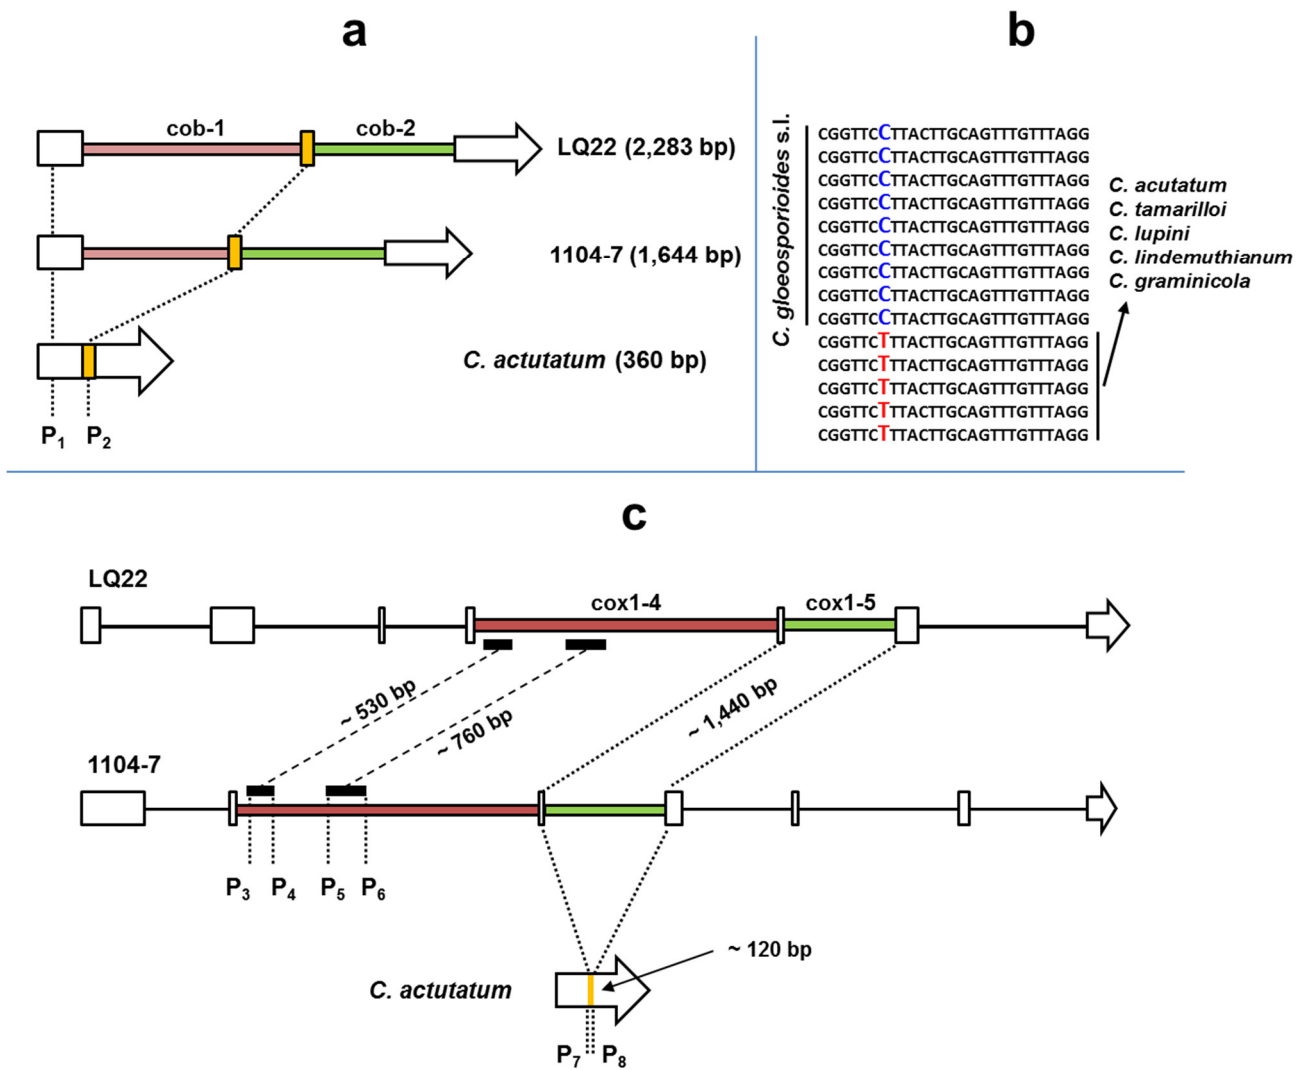

**Figure S3.** Primer design strategies for PCR-based identification of *C. gloeosporioides* s.l.. Primer designs were based on sequence alignment of all 14 known *Colletotrichum* mitogenomes. **a.** P<sub>1</sub>/P<sub>2</sub> is expected to produce a ~ 360 bp band for isolates not belonging to *C. gloeosporioides* s.l., and a band larger than 1,500 bp for *C. gloeosporioides* s.l. isolates. **b.** The P<sub>1</sub> primer binding site sequences of the 14 *Colletotrichum* mitogenomes, indicating high-level nucleotide conservation. **c.** Primer locations and expected amplicon sizes for P<sub>3</sub>/P<sub>4</sub>, P<sub>5</sub>/P<sub>6</sub>, and P<sub>7</sub>/P<sub>8</sub> primer pairs in (LQ22, 1104-7) and out of *C. gloeosporioides* s.l. (*C. actutatum*).
