# Supplementary material for: Comparative analysis of the mitochondrial genomes of Colletotrichum gloeosporioides sensu lato: insights into the evolution of a fungal species complex interacting with diverse plants
Source: PubMed Central journal article supplement (PMC5311727; doi:10.1186/s12864-016-3480-x), 2017-02-15
Supplement: 12864_2016_3480_MOESM5_ESM.pdf [file 12864_2016_3480_MOESM5_ESM.pdf]

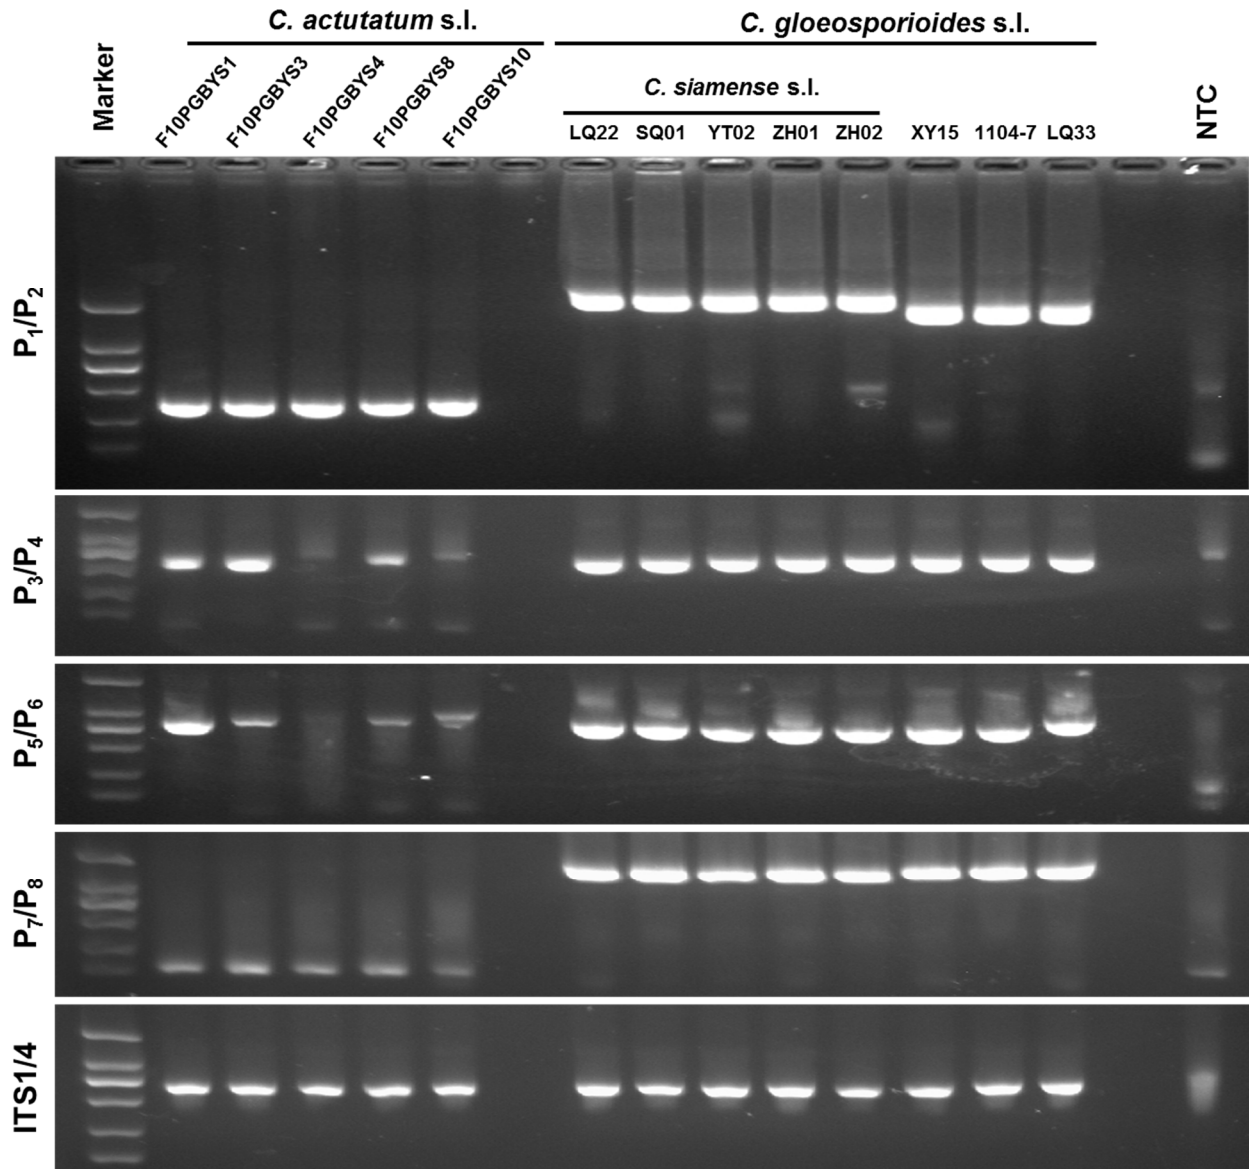

**Figure S4.** PCR amplification results of the primers tested for differentiating *C. gloeosporioides* s.l. from *C. actutatum* s.l.. ITS1/4 was used as a positive control. P<sub>1</sub>/P<sub>2</sub> showed the best specificity and consistency among all tested ones. In P<sub>1</sub>/P<sub>2</sub> result, the smaller amplicon sizes of XY15, 1104-7 and LQ33 were due to a smaller cob-1 intron size (Figure S4a). NTC, no template control.
