# Supplementary material for: Comparative analysis of the mitochondrial genomes of Colletotrichum gloeosporioides sensu lato: insights into the evolution of a fungal species complex interacting with diverse plants
Source: PubMed Central journal article supplement (PMC5311727; doi:10.1186/s12864-016-3480-x), 2017-02-15
Supplement: 12864_2016_3480_MOESM8_ESM.pdf [file 12864_2016_3480_MOESM8_ESM.pdf]

## GS

|                         | 26 | 49 | 50 | 55 | 67 | 68 | 76 | 116 | 118 | 121 | 145 | 262 | 322 | 372 | 429 | 458 | 545 | 564 | 566 | 600 | 627 | 629 | 634 | 637 | 755 | 784 | 785 | 797 | 806 | 844 | 856 |
|-------------------------|----|----|----|----|----|----|----|-----|-----|-----|-----|-----|-----|-----|-----|-----|-----|-----|-----|-----|-----|-----|-----|-----|-----|-----|-----|-----|-----|-----|-----|
| YT02                    | C  | C  | A  | T  | T  | C  | C  | T   | T   | C   | G   | G   | C   | T   | A   | A   | T   | G   | C   | T   | A   | A   | A   | G   | C   | C   | A   | T   | T   | C   | G   |
| SQ01                    | A  | C  | T  | C  | C  | T  | G  | T   | C   | C   | A   | G   | T   | T   | G   | G   | C   | A   | T   | C   | A   | G   | C   | A   | A   | T   | G   | C   | C   | T   | C   |
| LQ22                    | A  | C  | T  | C  | C  | T  | G  | T   | C   | C   | A   | G   | T   | T   | G   | G   | C   | A   | T   | C   | A   | G   | C   | A   | A   | T   | G   | C   | C   | T   | C   |
| ZH01                    | C  | -  | T  | C  | T  | T  | C  | G   | C   | T   | A   | G   | T   | A   | G   | A   | T   | G   | C   | C   | T   | G   | A   | G   | C   | T   | G   | C   | C   | C   | C   |
| ZH02                    | C  | -  | T  | C  | T  | T  | C  | G   | C   | T   | A   | G   | T   | A   | G   | A   | T   | G   | C   | C   | T   | G   | A   | G   | C   | T   | G   | C   | C   | C   | C   |
| ZH03                    | A  | C  | T  | C  | T  | T  | C  | T   | C   | C   | A   | A   | T   | T   | G   | G   | C   | G   | T   | C   | A   | G   | C   | A   | A   | T   | G   | C   | C   | T   | C   |
| YT02-specific mutation? |    | *  | *  |    | *  |    |    | *   | *   | *   | *   | *   | *   | *   |     |     |     |     |     | *   | *   |     |     |     | *   | *   | *   | *   | *   | *   |     |

## SOD2

|                              | 23 | 65 | 83 | 95 | 101 | 146 | 216 | 217 | 219 | 221 | 224 | 239 | 255 | 281 | 305 | 368 |
|------------------------------|----|----|----|----|-----|-----|-----|-----|-----|-----|-----|-----|-----|-----|-----|-----|
| SQ01                         | G  | C  | A  | C  | C   | T   | G   | A   | C   | C   | C   | A   | T   | C   | A   | C   |
| YT02                         | A  | C  | G  | T  | T   | C   | A   | G   | C   | G   | T   | T   | C   | A   | C   | T   |
| LQ22                         | A  | C  | G  | T  | T   | C   | A   | G   | C   | G   | T   | T   | C   | A   | C   | T   |
| ZH01                         | A  | C  | G  | T  | T   | C   | A   | G   | G   | G   | T   | T   | T   | C   | C   | T   |
| ZH02                         | A  | T  | G  | T  | T   | C   | A   | G   | C   | G   | T   | T   | C   | A   | C   | T   |
| ZH03                         | A  | C  | G  | T  | T   | C   | A   | G   | C   | G   | T   | T   | C   | A   | C   | T   |
| Codon position               | 3  | 3  | 3  | 3  | 3   | 3   | 1   | 2   | 1   | 3   | 3   | 3   | 1   | 3   | 3   | 3   |
| Synonymous or nonsynonymous? | S  | S  | S  | S  | S   | S   | N   | N   | N   | S   | S   | S   | S   | S   | S   | S   |
| SQ01-specific mutation?      | *  | *  | *  | *  | *   | *   | *   | *   |     | *   | *   | *   |     |     | *   | *   |

**Figure S7.** DNA polymorphism sites in the GS (glutamine synthetase) and SOD2 (manganese-superoxide dismutase) alignments of *C. siamense* s.l. isolates. The 858 bp long GS alignment is made up of a long partial intron (1-850 bp) and a short partial coding region (851-858 bp), the 374 bp long SOD2 alignment is entirely in the coding region.
